# Supplementary material for: Role of acid sites and surface hydroxyl groups in isophthalonitrile hydrogenation catalyzed by supported Ni–Co catalysts
Source: Royal Society of Chemistry journal article supplement (doi:10.1039/c5ra01007a), 2015-01-01
Supplement: c5ra01007a1.pdf [file c5ra01007a1.pdf]

## Supplementary Information

### Role of Acid Sites and Surface Hydroxyl Groups in Isophthalonitrile Hydrogenation Catalyzed by Supported Ni-Co Catalysts

Chang Liu, Ruijun Hou, Tiefeng Wang\*

*Beijing Key Laboratory of Green Reaction Engineering and Technology*

*Department of Chemical Engineering, Tsinghua University, Beijing, 100084, China*

\*Corresponding author: 86-10-62794132, [wangtf@tsinghua.edu.cn](mailto:wangtf@tsinghua.edu.cn)

**Table S1.** Comparison of the calculation results of  $k_r$  over  $x\text{Ni-}y\text{Co}/\text{Al}_2\text{O}_3$  using two models

| Catalyst                                     | Reaction results <sup>a</sup>                                      |                                 |
|----------------------------------------------|--------------------------------------------------------------------|---------------------------------|
|                                              | $k_r(10^{-2} \text{ mol}^{0.2} \text{ L}^{-0.2} \text{ min}^{-1})$ | $k_r(10^{-2} \text{ min}^{-1})$ |
|                                              | $p=0.8^b$                                                          | $p=1^b$                         |
| 2.5Ni-0.625Co/Al <sub>2</sub> O <sub>3</sub> | 0.6 (0.99)                                                         | 0.9 (0.98)                      |
| 5Ni-1.25Co/Al <sub>2</sub> O <sub>3</sub>    | 2.1 (0.99)                                                         | 3.6 (0.89)                      |
| 10Ni-2.5Co/Al <sub>2</sub> O <sub>3</sub>    | 2.4 (0.99)                                                         | 4.2 (0.96)                      |
| 20Ni-5Co/Al <sub>2</sub> O <sub>3</sub>      | 2.8 (0.99)                                                         | 5.9 (0.93)                      |

<sup>a</sup> Reaction conditions: 80 °C, 6.0 MPa, catalyst of 200~400 μm containing 0.25g Ni and 0.0625g Co, 80 mL of toluene and 20 mL of methanol as solvent, 2.9 g of IPN feed, 0.086 g of NaOH, 180 mL min<sup>-1</sup> H<sub>2</sub> gas flow, and stirring speed of 800 rpm.

<sup>b</sup> The numbers in brackets are the corresponding R<sup>2</sup>.

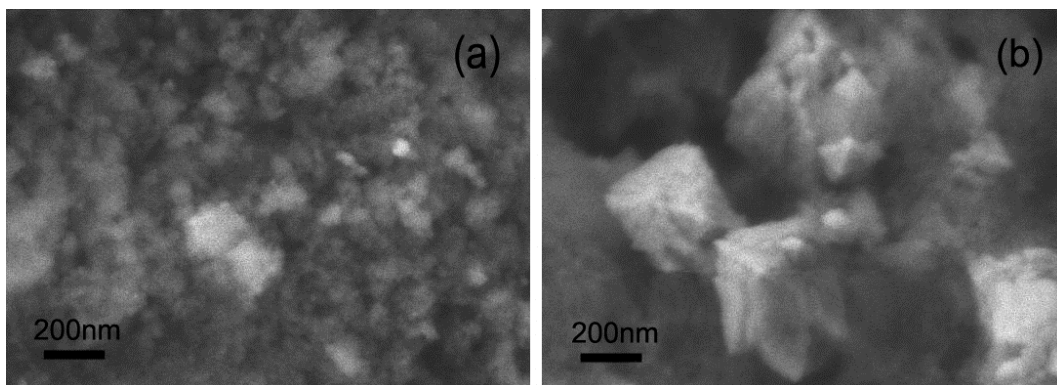

**Fig. S1.** SEM images of (a) 20Ni-5Co/SiO<sub>2</sub>, (b) 20Ni-5Co/Al<sub>2</sub>O<sub>3</sub>(SI)

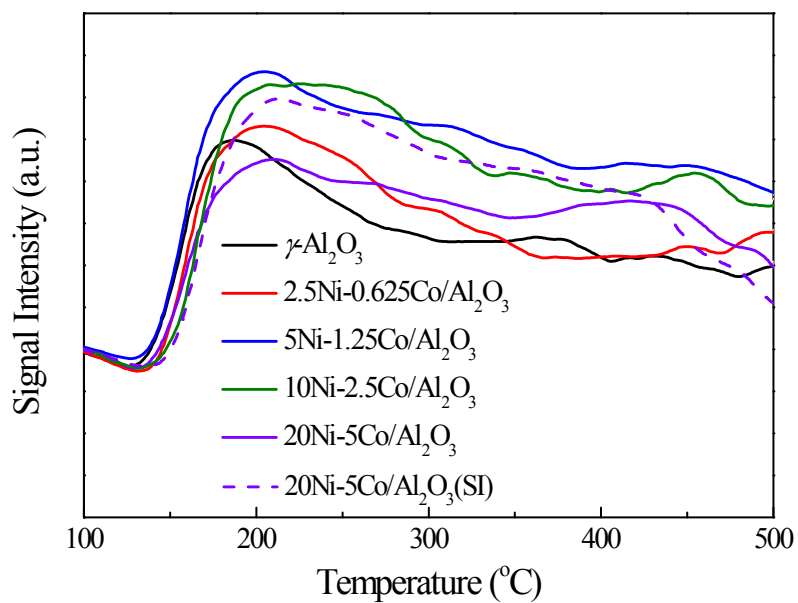

**Fig. S2.** NH<sub>3</sub>-TPD profiles of  $\gamma$ -Al<sub>2</sub>O<sub>3</sub> supported catalysts and the support

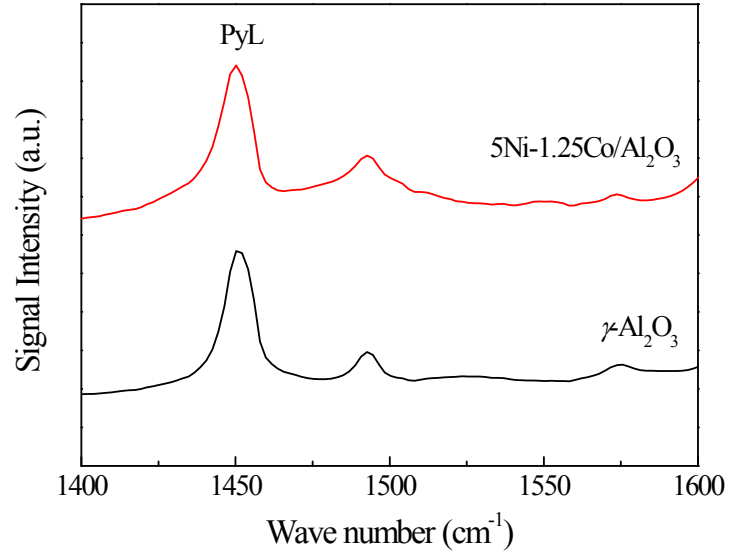

**Fig. S3.** FT-IR spectra of pyridine adsorbed on  $\gamma\text{-Al}_2\text{O}_3$  and  $5\text{Ni-1.25Co/Al}_2\text{O}_3$  at  $200\text{ }^\circ\text{C}$  (after background correction). The bands at  $1450\text{ cm}^{-1}$  are the characteristic peaks of Lewis (PyL) acid sites, and those at  $1490\text{ cm}^{-1}$  were the characteristic peaks of  $\gamma\text{-Al}_2\text{O}_3$ .

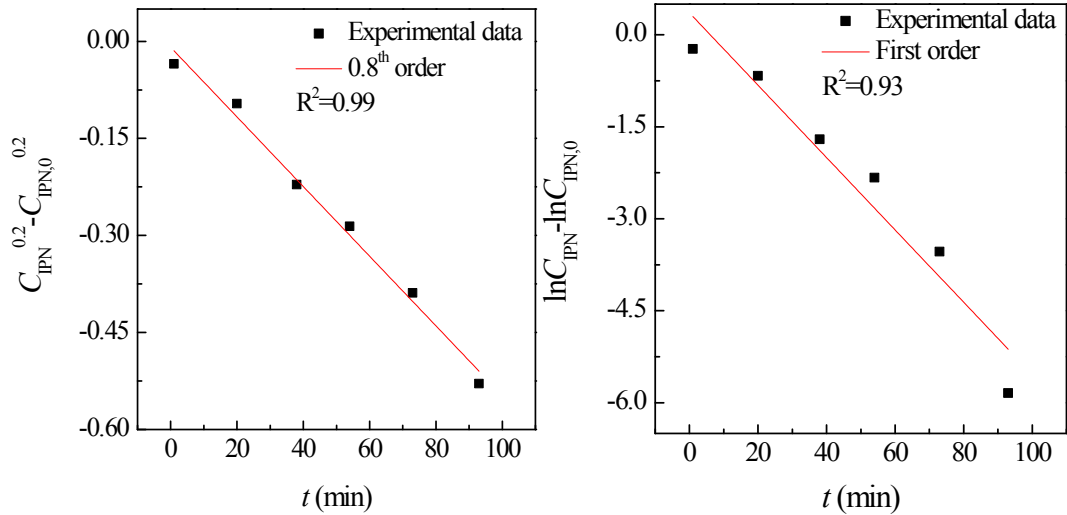

**Fig. S4.** Fitting results of  $k_t$  over  $20\text{Ni-5Co/Al}_2\text{O}_3$  with reaction order of  $p = 0.8$  and  $1.0$

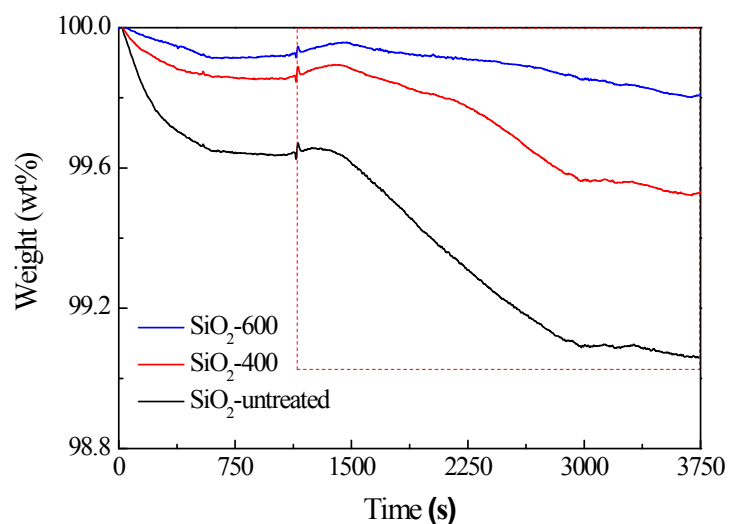

**Fig. S5.** TG-DTA profiles of the treated and untreated SiO<sub>2</sub>

SiO<sub>2</sub>-400 and SiO<sub>2</sub>-600 were the SiO<sub>2</sub> samples calcined at 400 °C and 600 °C for 4 h, respectively.

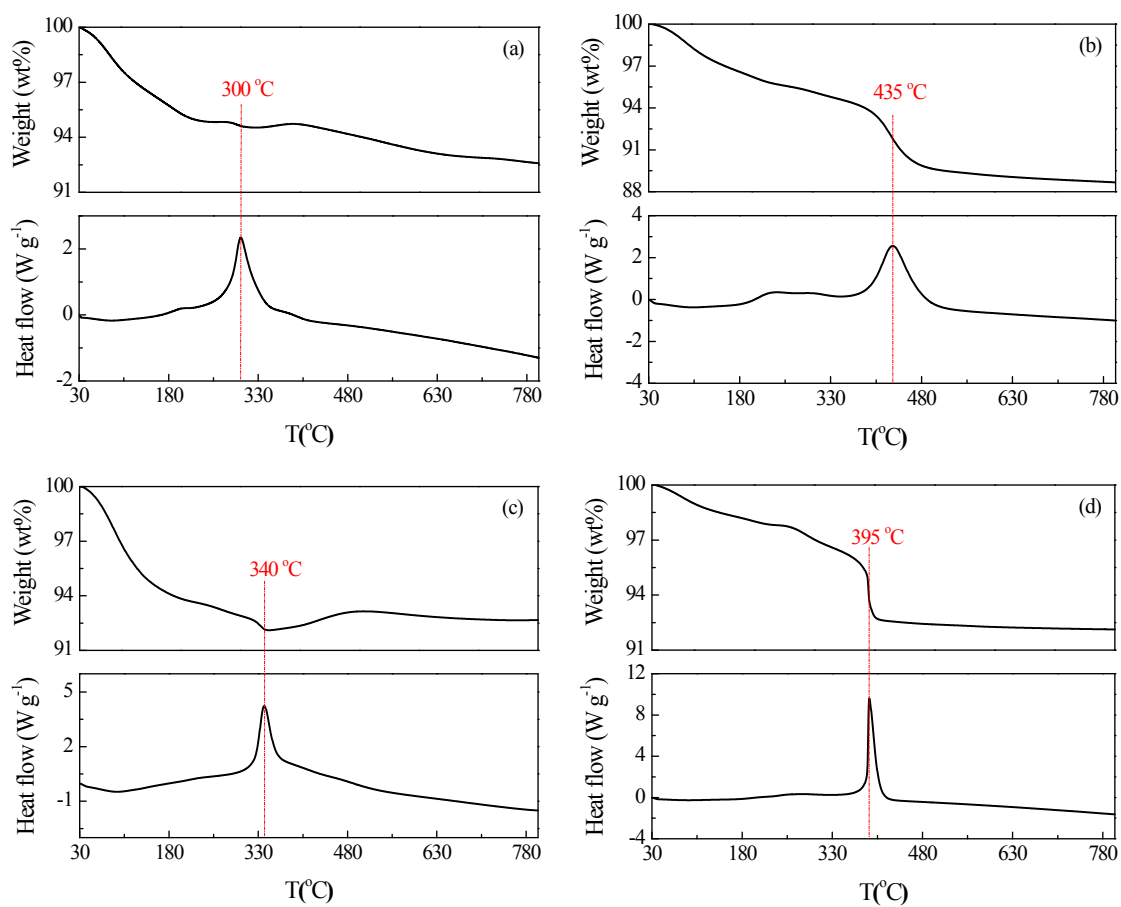

**Fig. S6.** TG-DTA results of the spent catalysts: (a) 20Ni-5Co/Al<sub>2</sub>O<sub>3</sub>(SI), (b) 2.5Ni-0.625Co/Al<sub>2</sub>O<sub>3</sub>, (c) 20Ni-5Co/SiO<sub>2</sub>(SI), (d) 2.5Ni-0.625Co/SiO<sub>2</sub>
